# Supplementary material
Source: publisher figshare collection journal article supplement (https://frontiersin.figshare.com/ndownloader/files/33191690)
Supplement: Supplementary file [file 33191690]

**Table S1. Results of microbial testing of *Centella asiatica* botanical raw material samples evaluated for the manufacture of a *Centella asiatica* clinical trial product (CAP), Gotu kola preblend manufacturing intermediate and final products CAP 0g, CAP 2g and CAP 4 g.**

CA-1 plant material (trade sample)

| Test       | Supplier's data      | OWH data                | OWH Specifications      |
|------------|----------------------|-------------------------|-------------------------|
| Coliforms  | N/A                  | <10 cfu/g               | Report only             |
| E.coli     | Absent               | <10 cfu/g /not detected | <10 mpn/g /not detected |
| Salmonella | Absent               | Absent in 25 g          | Absent in 25 g          |
| APC        | 7885 cfu/g           | 4,800 cfu/g             | <10,000,000 cfu/g       |
| Mold       | Yeast+mold 854 cfu/g | <100 cfu/g              | <100,000 cfu/g          |
| Yeast      | Yeast+mold 854 cfu/g | 2,400 cfu/g             | <100,000 cfu/g          |

CA-2 plant material (trade sample)

| Test       | Supplier's data | OWH data | OWH Specifications      |
|------------|-----------------|----------|-------------------------|
| Coliforms  | N/A             | N/A      | Report only             |
| E.coli     | N/A             | Conforms | <10 mpn/g /not detected |
| Salmonella | N/A             | Conforms | Absent in 25 g          |
| APC        | N/A             | N/A      | <10,000,000 cfu/g       |
| Mold       | N/A             | N/A      | <100,000 cfu/g          |
| Yeast      | N/A             | N/A      | <100,000 cfu/g          |

CA-3 plant material (trade sample)

| Test       | Supplier's data          | OWH data                | OWH Specifications      |
|------------|--------------------------|-------------------------|-------------------------|
| Coliforms  | <100 cfu/g               | <10 cfu/g               | Report only             |
| E.coli     | Negative                 | <10 cfu/g /not detected | <10 mpn/g /not detected |
| Salmonella | Negative                 | Negative                | Absent in 25 g          |
| APC        | 12,500 cfu/g             | 200,700 cfu/g           | <10,000,000 cfu/g       |
| Mold       | Yeast and mold 450 cfu/g | <500 cfu/g              | <100,000 cfu/g          |
| Yeast      | Yeast and mold 450 cfu/g | 600 cfu/g               | <100,000 cfu/g          |

CA-3 plant material (bulk sample)

| Test       | Supplier's data          | OWH data    | OWH Specifications      |
|------------|--------------------------|-------------|-------------------------|
| Coliforms  | <100 cfu/g               | <10 cfu/g   | Report only             |
| E.coli     | Negative                 | <10 cfu/g   | <10 mpn/g /not detected |
| Salmonella | Negative                 | Negative    | Absent in 25 g          |
| APC        | 12,500 cfu/g             | <5000 cfu/g | <10,000,000 cfu/g       |
| Mold       | Yeast and mold 450 cfu/g | <500 cfu/g  | <100,000 cfu/g          |
| Yeast      | Yeast and mold 450 cfu/g | 500 cfu/g   | <100,000 cfu/g          |

CA-6 plant material (trade sample)

| Test       | Supplier's data | OWH data | OWH Specifications      |
|------------|-----------------|----------|-------------------------|
| Coliforms  | 100 cfu/g       | N/A      | Report only             |
| E.coli     | Absent/10g      | N/A      | <10 mpn/g /not detected |
| Salmonella | Negative/25g    | N/A      | Absent in 25 g          |
| APC        | 50,000 cfu/g    | N/A      | <10,000,000 cfu/g       |
| Mold       | 100 cfu/g       | N/A      | <100,000 cfu/g          |
| Yeast      | 100 cfu/g       | N/A      | <100,000 cfu/g          |

CA-6 plant material (bulk sample)

| Test       | Supplier's data | OWH data     | OWH Specifications      |
|------------|-----------------|--------------|-------------------------|
| Coliforms  | 100 cfu/g       | >7000 cfu/g  | Report only             |
| E.coli     | Absent/10g      | <10 cfu/g    | <10 mpn/g /not detected |
| Salmonella | Negative/25g    | Negative     | Absent in 25 g          |
| APC        | 50,000 cfu/g    | 10,000 cfu/g | <10,000,000 cfu/g       |
| Mold       | 100 cfu/g       | <500 cfu/g   | <100,000 cfu/g          |
| Yeast      | 100 cfu/g       | <500 cfu/g   | <100,000 cfu/g          |

CA-7 plant material (trade sample)

| Test       | Supplier's data | OWH data | OWH Specifications      |
|------------|-----------------|----------|-------------------------|
| Coliforms  | <10 cfu/g       | N/A      | Report only             |
| E.coli     | <10 cfu/g       | N/A      | <10 mpn/g /not detected |
| Salmonella | Negative        | N/A      | Absent in 25 g          |
| APC        | <100 cfu/g      | N/A      | <10,000,000 cfu/g       |
| Mold       | <100 cfu/g      | N/A      | <100,000 cfu/g          |
| Yeast      | <100 cfu/g      | N/A      | <100,000 cfu/g          |

CA-8 plant material (trade sample)

| Test       | Supplier's data | OWH data | OWH Specifications      |
|------------|-----------------|----------|-------------------------|
| Coliforms  | <3 mpn/g        | N/A      | Report only             |
| E.coli     | <3 mpn/g        | N/A      | <10 mpn/g /not detected |
| Salmonella | Negative/25g    | N/A      | Absent in 25 g          |
| APC        | 380 cfu/g       | N/A      | <10,000,000 cfu/g       |
| Mold       | <10 cfu/g       | N/A      | <100,000 cfu/g          |
| Yeast      | <10 cfu/g       | N/A      | <100,000 cfu/g          |

Gotu kola preblend (CAW spray dried extract blended from two batches)

| Test       | OWH data  | OWH Specifications      |
|------------|-----------|-------------------------|
| Coliforms  | <10 cfu/g | Report only             |
| E.coli     | <10 mpn/g | <10 mpn/g /not detected |
| Salmonella | Negative  | Absent in 25 g          |
| APC        | N/A       | <10,000,000 cfu/g       |
| Mold       | N/A       | <100,000 cfu/g          |
| Yeast      | N/A       | <100,000 cfu/g          |

CAP 0g

| Test       | OWH data   | OWH Specifications      |
|------------|------------|-------------------------|
| Coliforms  | <10 cfu/g  | Report only             |
| E.coli     | <10 mpn/g  | <10 mpn/g /not detected |
| Salmonella | Negative   | Absent in 25 g          |
| APC        | <500 cfu/g | <10,000,000 cfu/g       |
| Mold       | <500 cfu/g | <100,000 cfu/g          |
| Yeast      | <500 cfu/g | <100,000 cfu/g          |

## CAP 2g

| Test       | OWH data      | OWH Specifications      |
|------------|---------------|-------------------------|
| Coliforms  | <10 cfu/g     | Report only             |
| E.coli     | <10 mpn/g     | <10 mpn/g /not detected |
| Salmonella | Negative      | Absent in 25 g          |
| APC        | <5000 cfu/g   | <10,000,000 cfu/g       |
| Mold       | <10,000 cfu/g | <100,000 cfu/g          |
| Yeast      | <500 cfu/g    | <100,000 cfu/g          |

## CAP 4g

| Test       | OWH data   | OWH Specifications      |
|------------|------------|-------------------------|
| Coliforms  | <10 cfu/g  | Report only             |
| E.coli     | <10 mpn/g  | <10 mpn/g /not detected |
| Salmonella | Negative   | Absent in 25 g          |
| APC        | <500 cfu/g | <10,000,000 cfu/g       |
| Mold       | <500 cfu/g | <100,000 cfu/g          |
| Yeast      | <500 cfu/g | <100,000 cfu/g          |

Suppliers data were taken from certificates of analysis; OWH = Oregon's Wild Harvest (Redmond, OR); "OWH data" were obtained by microbial testing in Oregon's Wild Harvest quality control laboratories; N/A = not available (data either not provided or not measured); APC = aerobic plate count; cfu = colony forming units; mpn = most probable number.
